# Supplementary material for: Chefs de Travaux - Livret d'accueil
Source: MDPI journal article supplement (doi:10.3390/ijms25021101), 2012-04-12
Supplement: s1 [file s1]

## Supplementary Files

**Table S1.** Primer sequences.

| Genes             | Sequence (5'-3')           | Length (bp) |
|-------------------|----------------------------|-------------|
| <i>POU5F1-F</i>   | GACAGGGGGAGGGGAGGAGCTAGG   | 24          |
| <i>POU5F1-R</i>   | CTTCCTCCAACCAGTTGCCCCAAAC  | 26          |
| <i>ISL1-F</i>     | AGATCAGCCTGCTTTTCAGC       | 20          |
| <i>ISL1-R</i>     | AGGACTGGCTAACCATGCTGT      | 21          |
| <i>TNNT2-F</i>    | ATGAGCGGGAGAAGGAGCGGCAGAAC | 26          |
| <i>TNNT2-R</i>    | TCAATGGCCAGCACCTTCCTCCTCTC | 26          |
| <i>MYL2-F</i>     | ACAGGGATGGCTTCATTGAC       | 20          |
| <i>MYL2-R</i>     | ATGCGTTGAGAATGGTTTCC       | 20          |
| <i>MYH7-F</i>     | ACATGCTGCTGATCACCAAC       | 20          |
| <i>MYH7-R</i>     | AAGCGTTATCAGTGGCCATG       | 20          |
| <i>MYL7-F</i>     | GGAGTTCAAAGAAGCCTTCAGC     | 22          |
| <i>MYL7-R</i>     | TCCTCTGGGACACTCACCTT       | 20          |
| <i>MYH6-F</i>     | TTCTCCGTGAAGGGATAACC       | 20          |
| <i>MYH6-R</i>     | CGTCTTCCCATTCTCGGTTTCAGC   | 24          |
| <i>18s rRNA-F</i> | AGGAATTGACGGAAGGGCACCA     | 22          |
| <i>18s rRNA-R</i> | GTGCAGCCCCGGACATCTAAG      | 21          |

<sup>1</sup> F: Forward

<sup>2</sup> R: Reverse

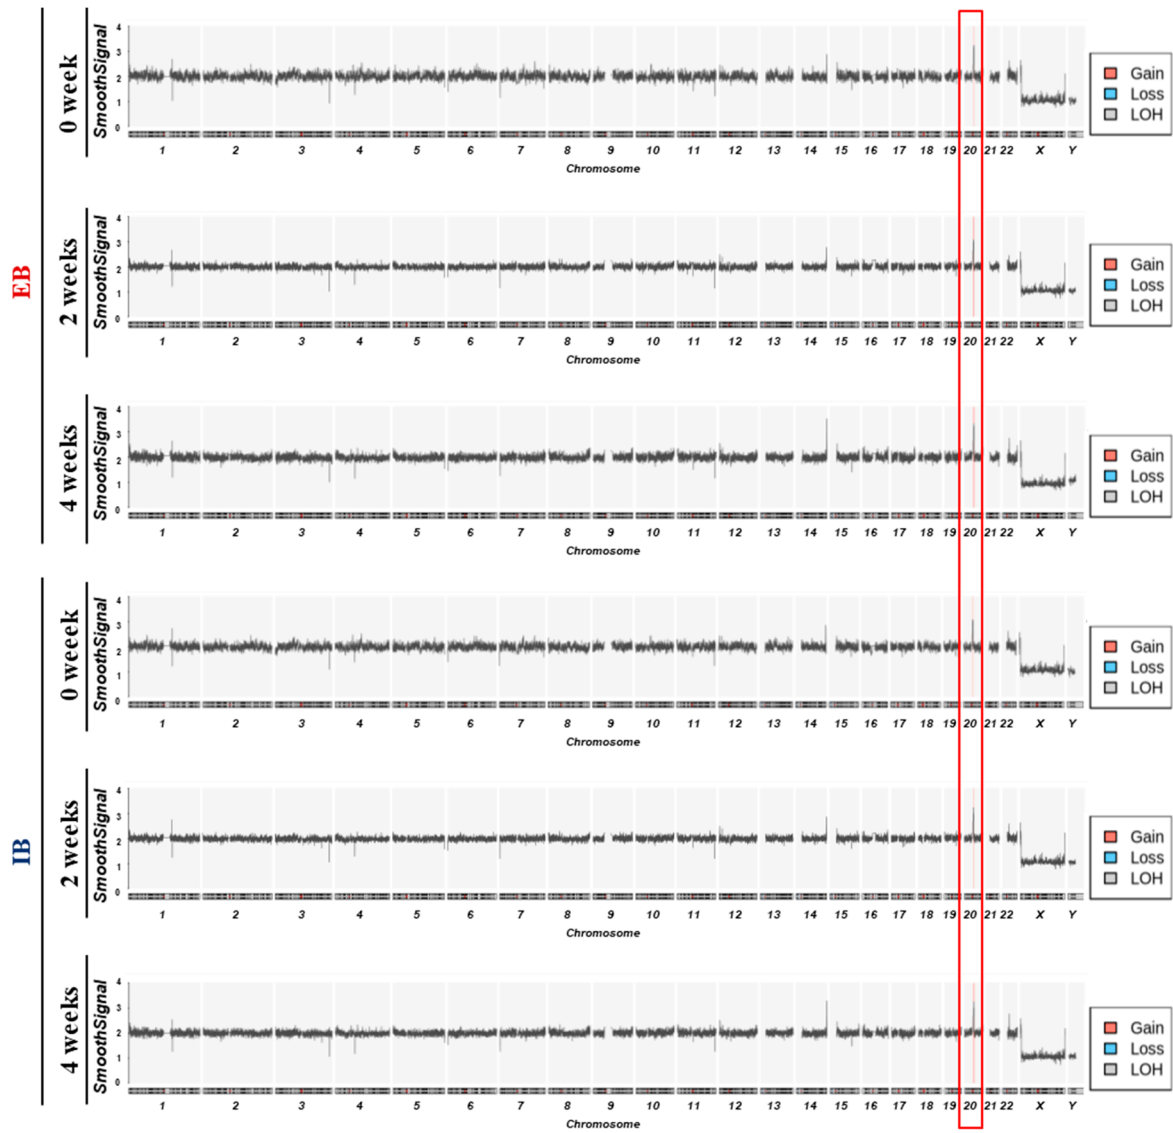

**Figure S1.** CytoscanHD chip analysis in hiPSC and hiPSC-CM.

## (A) KMT2C

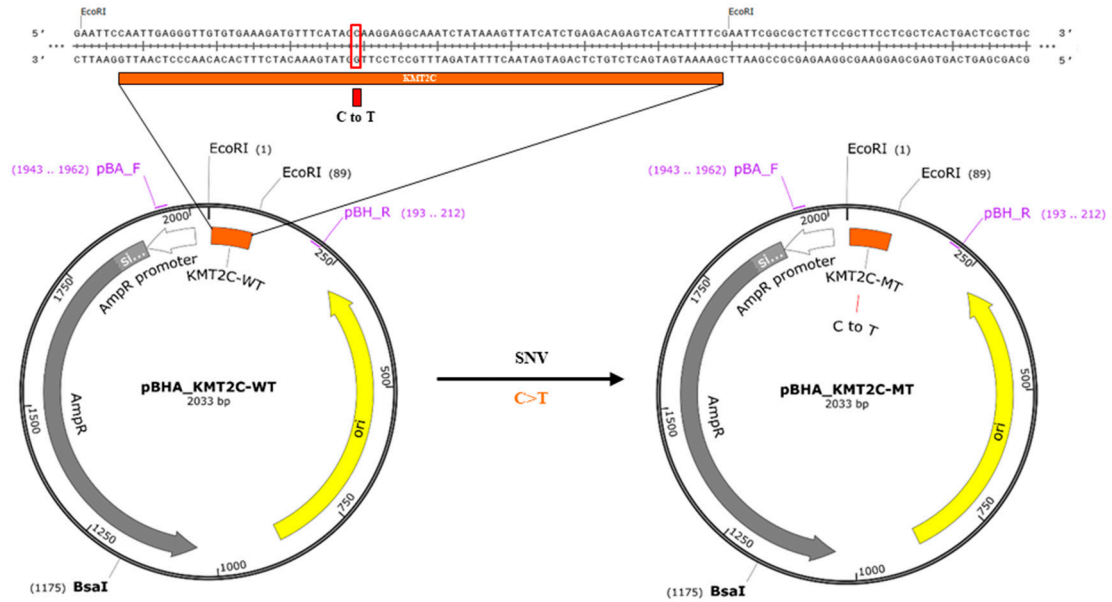

## (B) BCOR

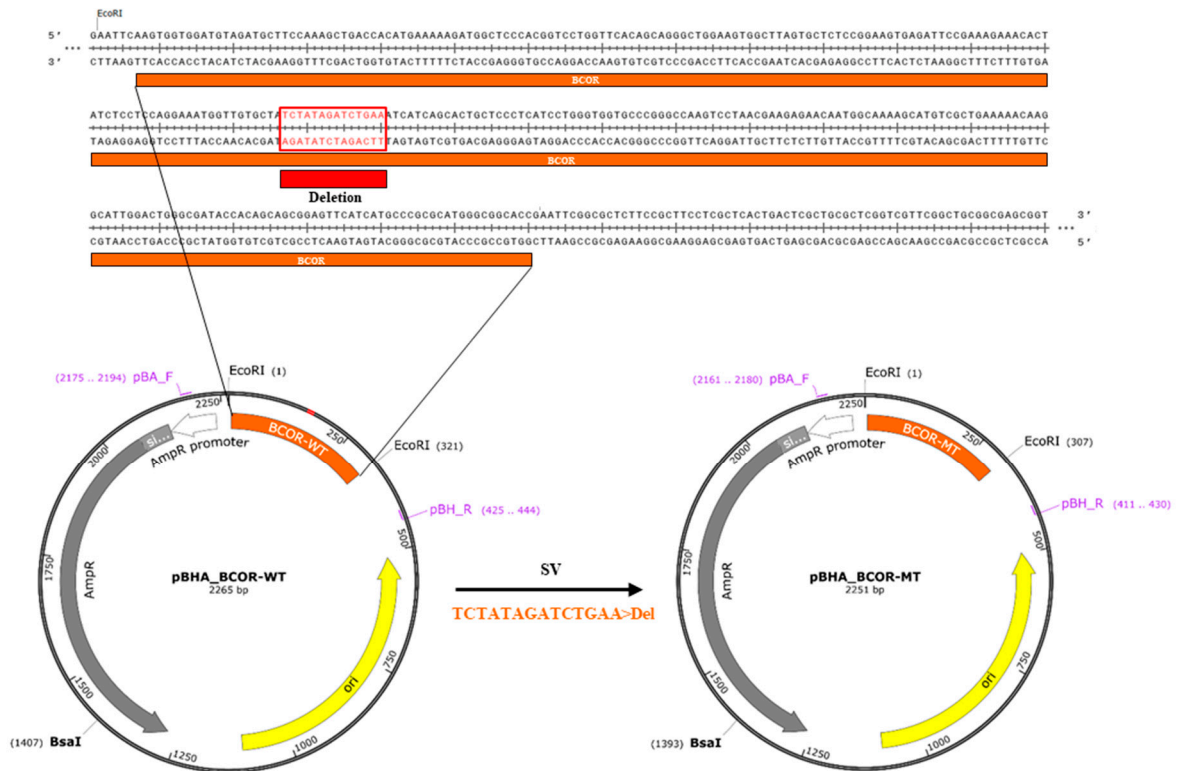

Figure S2. Plasmid vector cloning for control template design.

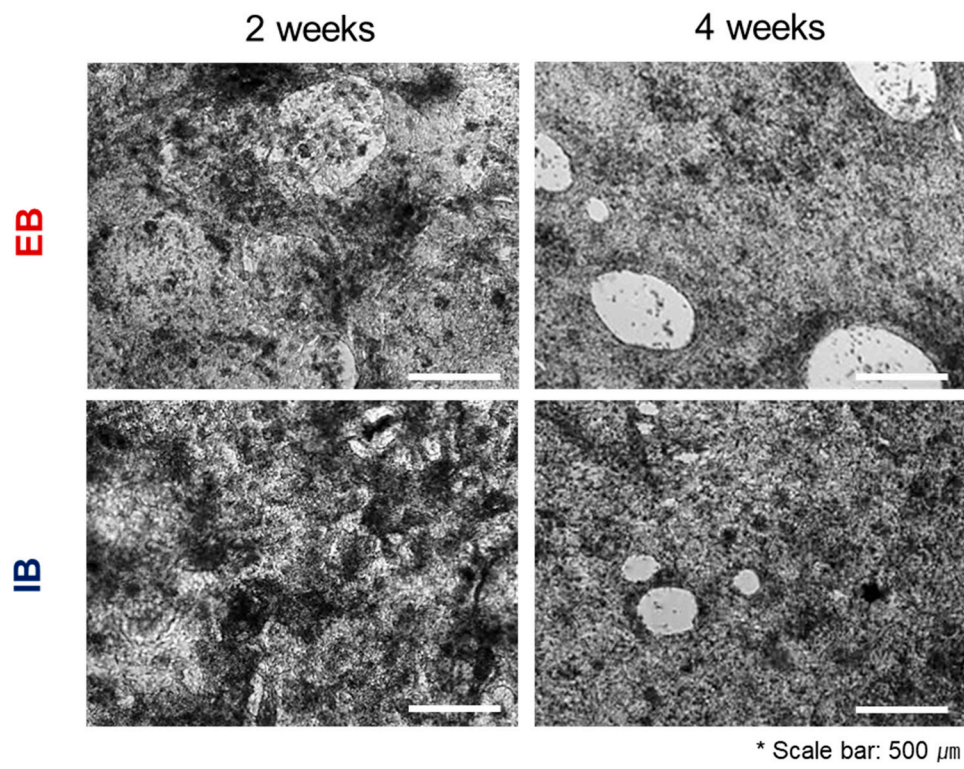

**Video S1.** Beating video of hiPSC-CM.
